# Supplementary material
Source: publisher figshare collection journal article supplement (https://acs.figshare.com/ndownloader/files/4598116)
Supplement: Supplementary file 1 [file 4598116]

## Supporting Information for

Modified Thermal-Optical Analysis Using Spectral Absorption Selectivity to

Distinguish Black Carbon from Pyrolyzed Organic Carbon

*Odelle L. Hadley\*, Craig E. Corrigan, and Thomas W. Kirchstetter*

Scripps Institution of Oceanography, MC 0221, La Jolla, California 92093-0221 and

Lawrence Berkeley National Laboratory, 1 Cyclotron Road, MS 70R0108B, Berkeley,

California, 94720

Email: [ohadley@ucsd.edu](mailto:ohadley@ucsd.edu),

Tel: (858) 534-7757

S1 – cover page

S2 – supplemental equations

S3 – List of symbols and abbreviations

Carbon mass is derived from the measured CO<sub>2</sub> as it is evolved from the filter. Equation S.1 converts the partial pressure of CO<sub>2</sub> into carbon mass. Oxygen is the carrier gas for the CO<sub>2</sub> and moles of O<sub>2</sub> are calculated from the concentration and flow rate. Finally the mass is divided by the temperature ramp rate, to obtain a carbon mass for each degree increase in temperature. The total amount of carbon on the filter is the sum of all carbon evolved between 50°C and 700°C.

$$C_{m a s s}(T_s) = \frac{\left( \frac{\mu m o l e_2}{m o l O_2} \right) \left( \frac{C_{CO_2}}{m o l} \right) * \left( \frac{0.04 m^3 O_2}{L O_2} \right) * \left( \frac{0.2 L O_2}{m i n} \right)}{\left( \frac{4^{\circ} C}{m i n} \right)} \quad S . 1$$

Equations S.2 and S.3 are obtained for the calculation of the coefficient  $\lambda$  in equation S.1 and by rewriting equation S.2 as equation 3) to solve

$$c_1(T)\lambda^{-k_{B C}} + c_2(T)\lambda^{-k_{c h a r}} \approx c(T)\lambda^{-k_m}, \text{ for } 0 \leq \lambda \leq 600 \text{ nm} \quad S . 2$$

$$c_2 = \frac{c\lambda^{-k_m} - c_1\lambda^{-k_{B C}}}{\lambda^{-k_{c h a r}}} \quad S . 3$$

After substituting S.2 into equation S.3,  $\lambda$  can be calculated, the results are shown in Figure 1.

$$c_1 = \frac{c \left( \lambda_2^{-k_m} - \lambda_1^{(-k_m+k_{char})} \lambda_2^{-k_{char}} \right)}{\left( \lambda_2^{-k_{BC}} - \lambda_1^{(-k_{BC}+k_{char})} \lambda_2^{-k_{char}} \right)}, \quad \begin{matrix} \lambda_1=530nm \\ \lambda_2=570nm \end{matrix} \quad S.4$$

The following table shows: the BC loading on the filter in micrograms retrieved using traditional thermo-optical analysis (TOA), the BC retrieved using the modified spectral analysis, the uncertainty for the modified version, and the difference between the two methods. For small loading, the two methods agree somewhat, but for a heavily laden filter, the positive bias due to the char is increasingly significant, nearly doubling the amount of apparent BC in some cases.

### Notation

|                |                                           |
|----------------|-------------------------------------------|
| k              | absorption angstrom exponent (AAE)        |
| A              | area of the sample spot on a filter       |
| ATN            | attenuation                               |
| c              | coefficient of attenuation                |
| c <sub>1</sub> | coefficient of attenuation for BC         |
| c <sub>2</sub> | coefficient of attenuation for char       |
| a              | fraction of attenuation from black carbon |
| I              | intensity of light                        |
| MAE            | mass attenuation efficiency               |

|           |                                                        |
|-----------|--------------------------------------------------------|
| BC        | mass of black carbon                                   |
| TC        | mass of carbon                                         |
| EC        | mass of elemental graphitic carbon                     |
| LAC       | mass of light absorbing carbon (black carbon and char) |
| OC        | mass of organic carbon                                 |
| T         | temperature                                            |
| TOA       | thermal-optical analysis                               |
| $\lambda$ | wavelength of light                                    |
| $\sigma$  | uncertainty                                            |
